# Supplementary material for: Perceived Stress and Adherence to the Dietary Recommendations and Blood Glucose Levels in Type 1 Diabetes
Source: Hindawi journal article supplement (doi:10.1155/2020/3548520), 2020-07-18
Supplement: f1 [file 3548520.f1.pdf]

**Perceived stress and adherence to the dietary recommendations and blood glucose levels in type 1 diabetes**

Aila J. Ahola,<sup>1,2,3</sup> Carol Forsblom,<sup>1,2,3</sup> Valma Harjutsalo,<sup>1,2,3,4</sup> Per-Henrik Groop,<sup>1,2,3,5\*</sup>, on behalf of the FinnDiane Study Group

<sup>1</sup>Folkhälsan Institute of Genetics, Folkhälsan Research Center, Helsinki, Finland

<sup>2</sup>Abdominal Center, Nephrology, University of Helsinki and Helsinki University Central Hospital, Helsinki, Finland

<sup>3</sup>Research Program for Clinical and Molecular Metabolism, Faculty of Medicine, University of Helsinki, Finland

<sup>4</sup>Chronic Disease Prevention Unit, National Institute for Health and Welfare, Helsinki, Finland

<sup>5</sup>Department of Diabetes, Central Clinical School, Monash University, Melbourne, Victoria, Australia.

\*Corresponding author: Per-Henrik Groop, Folkhälsan Research Center, Biomedicum Helsinki C318b, PO Box 63, FI-00014 University of Helsinki, Finland. Tel +358 500 430 436. Email: per-henrik.groop@helsinki.fi

## The Finnish Diabetic Nephropathy Study Centers

|                                                                                         |                                                                                                                                                                                                                             |
|-----------------------------------------------------------------------------------------|-----------------------------------------------------------------------------------------------------------------------------------------------------------------------------------------------------------------------------|
| Anjalankoski Health Center                                                              | S.Koivula, T.Uggeldahl                                                                                                                                                                                                      |
| Central Finland Central Hospital, Jyväskylä                                             | T.Forslund, A.Halonen, A.Koistinen, P.Koskiaho,<br>M.Laukkanen, J.Saltevo, M.Tiihonen                                                                                                                                       |
| Central Hospital of Åland Islands, Mariehamn                                            | M.Forsen, H.Granlund, A.-C.Jonsson, B.Nyroos                                                                                                                                                                                |
| Central Hospital of Kanta-Häme, Hämeenlinna                                             | P.Kinnunen, A.Orvola, T.Salonen, A.Vähänen                                                                                                                                                                                  |
| Central Hospital of Kymenlaakso, Kotka                                                  | R.Paldanius, M.Riihelä, L.Ryysy                                                                                                                                                                                             |
| Central Hospital of Länsi-Pohja, Kemi                                                   | H.Laukkanen, P.Nyländen, A.Sademies                                                                                                                                                                                         |
| Central Ostrobothnian Hospital District, Kokkola                                        | S.Anderson, B.Asplund, U.Byskata, P.Liedes,<br>M.Kuusela, T.Virkkala                                                                                                                                                        |
| City of Espoo Health Center:                                                            |                                                                                                                                                                                                                             |
| Espoonlahti                                                                             | A.Nikkola, E.Ritola                                                                                                                                                                                                         |
| Tapiola                                                                                 | M.Niska, H.Saarinen                                                                                                                                                                                                         |
| Samaria                                                                                 | E.Oukko-Ruonen, T.Virtanen                                                                                                                                                                                                  |
| Viherlaakso                                                                             | A.Lyytinen                                                                                                                                                                                                                  |
| City of Helsinki Health Center:                                                         |                                                                                                                                                                                                                             |
| Puistola                                                                                | H.Kari, T.Simonen                                                                                                                                                                                                           |
| Suutari                                                                                 | A.Kaprio, J.Kärkkäinen, B.Rantaeskola                                                                                                                                                                                       |
| Töölö                                                                                   | P.Kääriäinen, J.Haaga, A-L.Pietiläinen                                                                                                                                                                                      |
| City of Hyvinkää Health Center                                                          | S.Klemetti, T.Nyandoto, E.Rontu, S.Satuli-Autere                                                                                                                                                                            |
| City of Vantaa Health Center:                                                           |                                                                                                                                                                                                                             |
| Korso                                                                                   | R.Toivonen, H.Virtanen                                                                                                                                                                                                      |
| Länsimäki                                                                               | R.Ahonen, M.Ivaska-Suomela, A.Jauhiainen                                                                                                                                                                                    |
| Martinlaakso                                                                            | M.Laine, T.Pellonpää, R.Puranen                                                                                                                                                                                             |
| Myyrmäki                                                                                | A.Airas, J.Laakso, K.Rautavaara                                                                                                                                                                                             |
| Rekola                                                                                  | M.Erola, E.Jatkola                                                                                                                                                                                                          |
| Tikkurila                                                                               | R.Lönnblad, A.Malm, J.Mäkelä, E.Rautamo                                                                                                                                                                                     |
| Heinola Health Center                                                                   | P.Hentunen, J.Lagerstam                                                                                                                                                                                                     |
| Helsinki University Central Hospital, Department of<br>Medicine, Division of Nephrology | M.Fedoroff, D.Gordin, O.Heikkilä, K.Hietala, J.Fagerudd, M.Korolainen,<br>L.Kyllönen, J.Kytö, S.Lindh, K.Pettersson-Fernholm, M.Rosengård-Bärlund,<br>A.Sandelin, L.Thorn, J.Tuomikangas, T.Vesisenaho, J.Wadén<br>V.Sipilä |
| Herttoniemi Hospital, Helsinki                                                          | T.Kalliomäki, J.Koskelainen, R.Nikkanen,                                                                                                                                                                                    |
| Hospital of Lounais-Häme, Forssa                                                        | N.Savolainen, H.Sulonen, E.Valtonen<br>L. Norvio, A.Hämäläinen                                                                                                                                                              |
| Hyvinkää Hospital                                                                       | E.Toivonen                                                                                                                                                                                                                  |
| Iisalmi Hospital                                                                        | A.Parta, I.Pirttiniemi                                                                                                                                                                                                      |
| Jokilaakso Hospital, Jämsä                                                              | S.Aranko, S.Ervasti, R.Kauppinen-Mäkelin,<br>A.Kuusisto, T.Leppälä, K.Nikkilä, L.Pekkonen                                                                                                                                   |
| Jorvi Hospital, Helsinki University Central Hospital                                    | K.Nuurva, M.Tiihonen<br>S.Jokelainen, K.Kananen, M.Karjalainen, P.Kemppainen, A-M.Mankinen,                                                                                                                                 |
| Jyväskylä Health Center, Kyllö                                                          |                                                                                                                                                                                                                             |
| Kainuu Central Hospital, Kajaani                                                        |                                                                                                                                                                                                                             |
| A.Reponen                                                                               | M.Sankari                                                                                                                                                                                                                   |
| Kerava Health Center                                                                    | H.Stuckey, P.Suominen                                                                                                                                                                                                       |
| Kirkkonummi Health Center                                                               | A.Lappalainen, M.Limatainen, J.Santaholma                                                                                                                                                                                   |
| Kivelä Hospital, Helsinki                                                               | A.Aimolahti, E.Huovinen                                                                                                                                                                                                     |
| Koskela Hospital, Helsinki                                                              | V.Ilkka, M.Lehtimäki                                                                                                                                                                                                        |
| Kotka Health Center                                                                     | E.Pälkkö-Kontinen, A.Vanhanen                                                                                                                                                                                               |
| Kouvola Health Center                                                                   | E.Koskinen, T.Siitonen                                                                                                                                                                                                      |
| Kuopio University Hospital                                                              | E.Huttunen, R.Ikäheimo, P.Karhapää, P.Kekäläinen,<br>M.Laakso, T.Lakka, E.Lampainen, L.Moilanen, S. Tanskanen<br>L.Niskanen, U.Tuovinen, I.Vauhkonen, E.Voutilainen                                                         |
| Kuusamo Health Center                                                                   | T.Kääriäinen, E.Isopoussu                                                                                                                                                                                                   |
| Kuusankoski Hospital                                                                    | E.Kilki, I.Koskinen, L.Riihelä                                                                                                                                                                                              |
| Laakso Hospital, Helsinki                                                               | T.Meriläinen, P.Poukka, R.Savolainen, N.Uhlenius                                                                                                                                                                            |
| Lahti City Hospital                                                                     | A.Mäkelä, M.Tanner                                                                                                                                                                                                          |
| Lapland Central Hospital, Rovaniemi                                                     | L.Hyvärinen, K.Lampela, S.Pöykkö, T.Rompasaari, S.Severinkangas, T.Tulokas                                                                                                                                                  |
| Lappeenranta Health Center                                                              | P. Erola, L.Härkönen, P.Linkola, T.Pekkanen, I.Pulli, E.Repo                                                                                                                                                                |
| Lohja Hospital                                                                          | T.Granlund, K.Hietanen, M.Porrassalmi, M.Saari, T.Salonen, M.Tiikkainen,                                                                                                                                                    |
| Länsi-Uusimaa Hospital, Tammisaari                                                      | I.-M.Jousmaa, J.Rinne                                                                                                                                                                                                       |
| Loimaa Health Center                                                                    | A.Mäkelä, P.Eloranta                                                                                                                                                                                                        |
| Malmi Hospital, Helsinki                                                                | H.Lanki, S.Moilanen, M.Tilly-Kiesi                                                                                                                                                                                          |
| Mikkeli Central Hospital                                                                | A.Gynther, R.Manninen, P.Nironen, M.Salminen,<br>T.Vänttinen                                                                                                                                                                |
| Mänttä Regional Hospital                                                                | I.Pirttiniemi, A-M.Hänninen                                                                                                                                                                                                 |
| North Karelian Hospital, Joensuu                                                        | U-M.Henttula, P.Kekäläinen, M.Pietarinen,<br>A.Rissanen, M.Voutilainen                                                                                                                                                      |
| Nurmijärvi Health Center                                                                | A.Burgos, K.Urtamo                                                                                                                                                                                                          |
| Oulaskangas Hospital, Oulainen                                                          | E.Jokelainen, P-L.Jylkkä, E.Kaarlela, J.Vuolaspuro                                                                                                                                                                          |
| Oulu Health Center                                                                      | L.Hiltunen, R.Häkkinen, S.Keinänen-Kiukaanniemi                                                                                                                                                                             |
| Oulu University Hospital                                                                | R.Ikäheimo                                                                                                                                                                                                                  |

|                                              |                                                                                                                                                          |
|----------------------------------------------|----------------------------------------------------------------------------------------------------------------------------------------------------------|
| Päijät-Häme Central Hospital                 | H.Haapamäki, A.Helanterä, S.Hämäläinen,<br>V.Ilvesmäki, H.Miettinen                                                                                      |
| Palokka Health Center                        | P.Sopanen, L.Welling                                                                                                                                     |
| Pieksämäki Hospital                          | V.Sevtsenko, M.Tamminen                                                                                                                                  |
| Pietarsaari Hospital                         | M-L.Holmbäck, B.Isomaa, L.Sarelin                                                                                                                        |
| Pori City Hospital                           | P.Ahonen, P.Merisalo, E.Muurinen, K.Sävelä                                                                                                               |
| Porvoo Hospital                              | M.Kallio, B.Rask, S.Rämö                                                                                                                                 |
| Raahe Hospital                               | A.Holma, M.Honkala, A.Tuomivaara, R.Vainionpää                                                                                                           |
| Rauma Hospital                               | K.Laine, K.Saarinen, T.Salminen                                                                                                                          |
| Riihimäki Hospital                           | P.Aalto, E.Immonen, L.Juurinen                                                                                                                           |
| Salo Hospital                                | A.Alanko, J.Lapinleimu, P.Rautio, M.Virtanen                                                                                                             |
| Satakunta Central Hospital, Pori             | M.Asola, M.Juhola, P.Kunelius, M.-L.Lahdenmäki,<br>P.Pääkkönen, M.Rautavirta                                                                             |
| Savonlinna Central Hospital                  | T.Pulli, P.Sallinen, M.Taskinen, E.Tolvanen, T.Tuominen                                                                                                  |
| Seinäjoki Central Hospital                   | H.Valtonen, A.Vartia, S-L.Viitanen                                                                                                                       |
| South Karelia Central Hospital, Lappeenranta | O.Antila, E.Korpi-Hyövälti, T.Latvala, E.Leijala, T.Leikkari, M.Punkari                                                                                  |
| Tampere Health Center                        | N.Rantamäki, H.Vähävuori                                                                                                                                 |
| Tampere University Hospital                  | T.Ensala, E.Hussi, R.Härkönen, U.Nyholm, J.Toivanen                                                                                                      |
| Tiirismaa Health Center, Hollola             | A.Vaden, P.Alarotu, E.Kujansuu, H.Kirkkopelto-Jokinen,                                                                                                   |
| Turku Health Center                          | M.Helin, S.Gummerus, L.Calonius, T.Niskanen, T.Kaitala,                                                                                                  |
| M.Vähätalo                                   | T.Vatanen                                                                                                                                                |
| Turku University Central Hospital            | P. Hannula, I.Ala-Houhala, R.Kannisto, T.Kuningas, P.Lampinen, M.Määttä,<br>H.Oksala, T.Oksanen, A.Putila, H.Saha, K.Salonen, H.Tauriainen,<br>S.Tulokas |
| Vaajakoski Health Center                     | T.Kivelä, L.Petlin, L.Savolainen                                                                                                                         |
| Valkeakoski Regional Hospital                | A.Artukka, I.Hämäläinen, L.Lehtinen, E.Pyysalo, H.Virtamo, M.Viinikkala,                                                                                 |
| Vammala Regional Hospital                    | K.Breitholz, R.Eskola, K.Metsärinne, U.Pietilä,                                                                                                          |
| Vasa Central Hospital                        | P.Saarinen, R.Tuominen, S.Äyräpää                                                                                                                        |
|                                              | K.Mäkinen, P.Sopanen                                                                                                                                     |
|                                              | S.Ojanen, E.Valtonen, H.Ylönen, M.Rautiainen,                                                                                                            |
|                                              | T.Immonen                                                                                                                                                |
|                                              | I.Isomäki, R.Kroneld, L.Mustaniemi, M.Tapiolinna-Mäkelä                                                                                                  |
|                                              | S.Bergkulla, U.Hautamäki, V-A.Myllyniemi, I.Rusk                                                                                                         |
